# Supplementary material for: Fabrication of three-lobed magnetic microrobots for cell transportation
Source: Royal Society of Chemistry journal article supplement (doi:10.1039/d3tb00613a), 2023-01-01
Supplement: d3tb00613a1.pdf [file d3tb00613a1.pdf]

Electronic Supplementary Information

**Fabrication of three-lobed magnetic microrobots for cell transportation**

Zameer Hussain Shah, Max Sokolich, Sudipta Mallick, David Rivas, Sambaeta Das\*

Department of Mechanical Engineering, University of Delaware, Newark, DE 19717 USA

E-mail: [samdass@udel.edu](mailto:samdass@udel.edu)

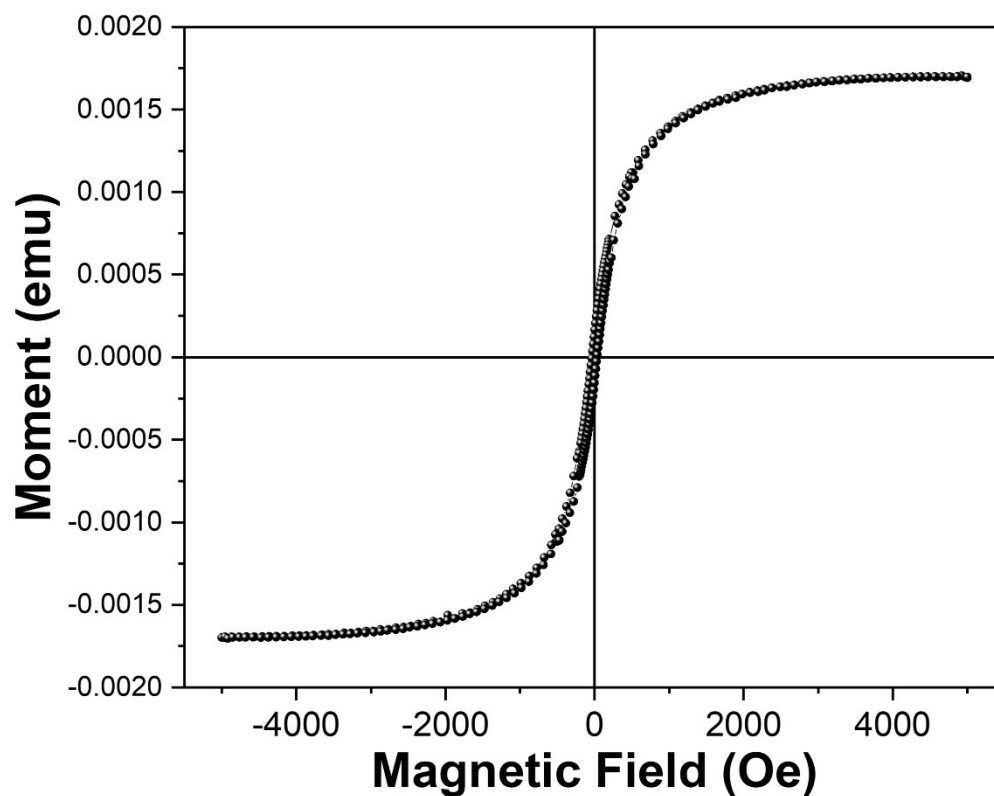

Fig. S1. Hysteresis loop for the three-lobed magnetic microrobots.

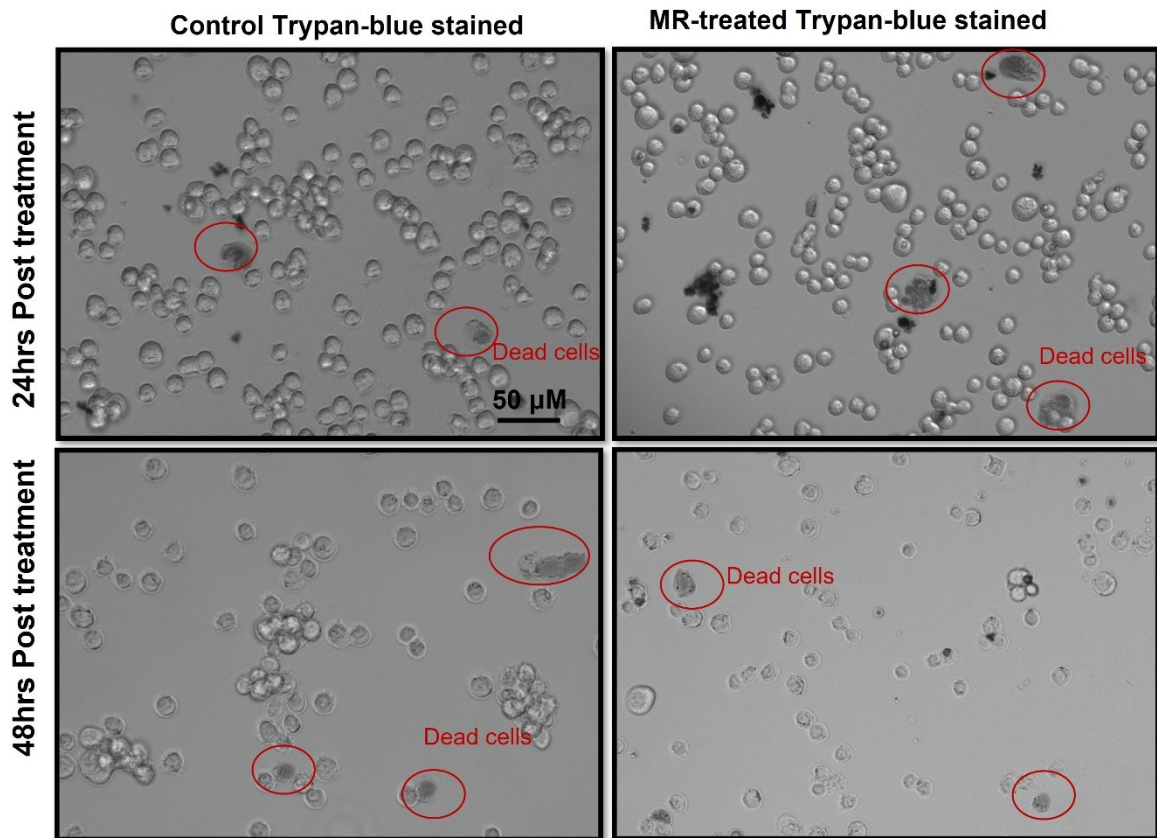

Fig. S2 Cells stained with trypan blue to assess cell viability after microrobot treatment after 24 hrs and 48 hrs.

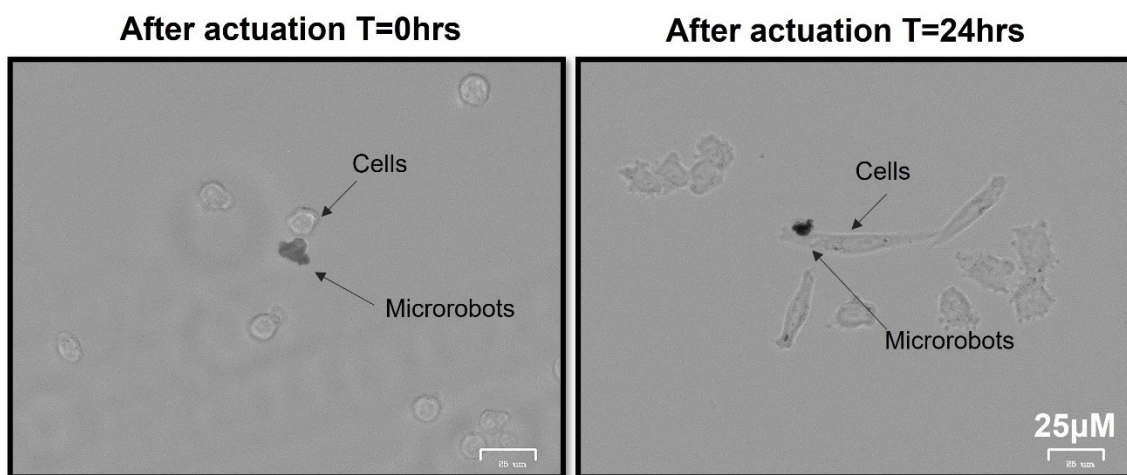

Fig. S3 Effect of actuation on CHO cells: Cell proliferation was unaffected after 24 hrs of actuation.

Video S1: Motion of uncoated three-lobed microrobots in a rotating magnetic field

Video S2: Motion of three-lobed microrobots in a rotating magnetic field

Video S3: Rotational motion of the three-lobed microrobot

Video S4: Closed-loop control of the three-lobed microrobot.

Video S5: Cell transportation by three-lobed microrobot

Video S6: Contactless transportation of a cell by a rotating microrobot
